# Supplementary material
Source: MDPI journal article supplement (https://www.mdpi.com/2073-4433/14/4/664)
Supplement: s1 [file s1 › atmosphere-2255380-supplementary.pdf]

# Supplementary Materials: Design and Simulation of Aerosol Inlet System for Particulate Matter with a Wide Size Range

Xubing Du <sup>1</sup>, Zeming Zhuo <sup>1</sup>, Xue Li <sup>1</sup>, Xuan Li <sup>1</sup>, Mei Li <sup>1</sup>, Junlin Yang <sup>2</sup>, Zhen Zhou <sup>1</sup>, Wei Gao <sup>1</sup>, Zhengxu Huang <sup>1</sup> and Lei Li <sup>1,\*</sup>

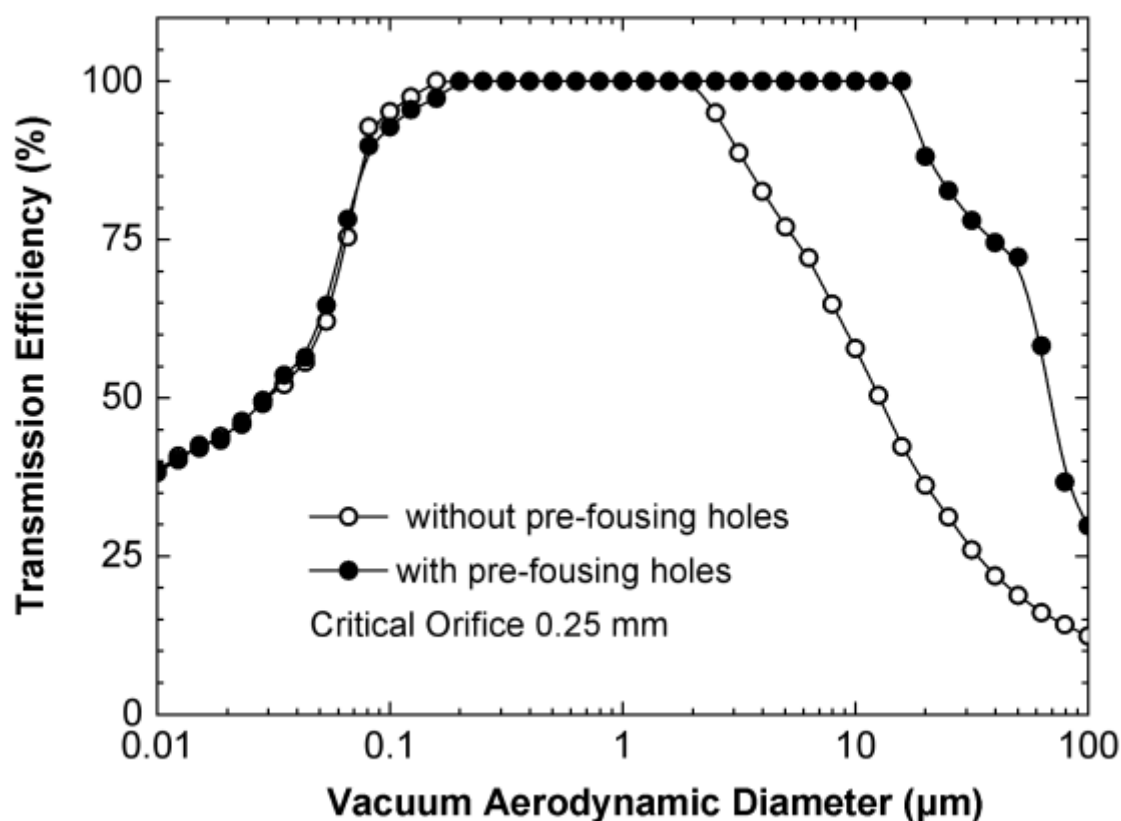

**Figure S1.** The transmission efficiency of PM with different sizes with and without pre-focusing.

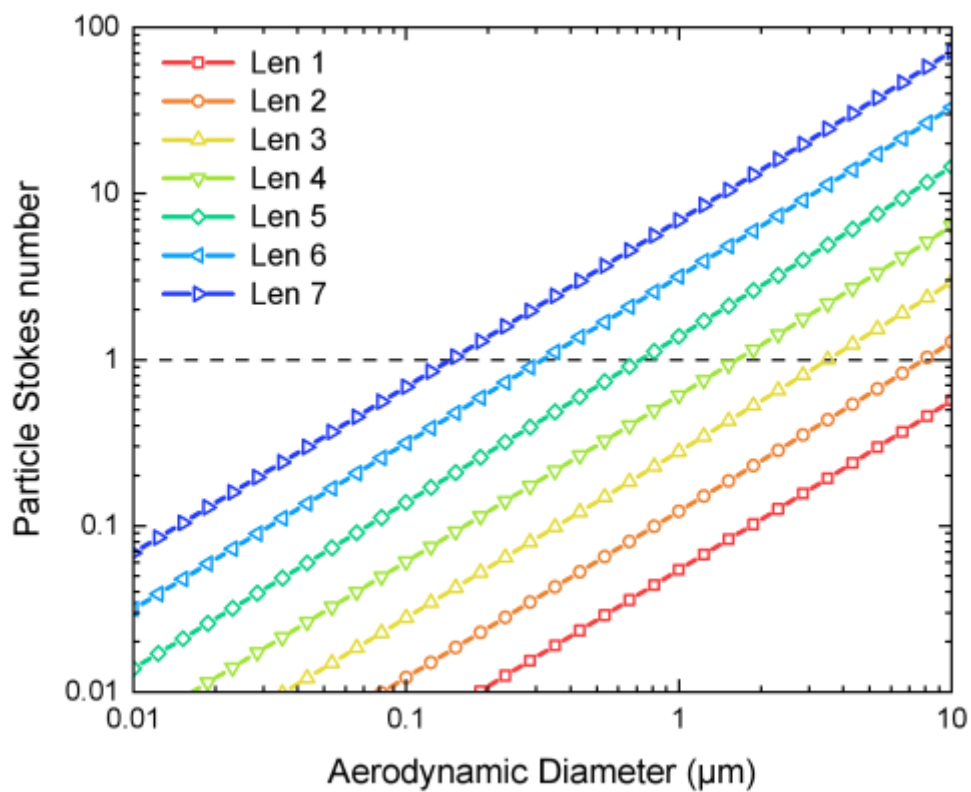

**Figure S2.** Particle Stokes number ( $St$ ) distribution of PM with different sizes at the orifice position of every lens.

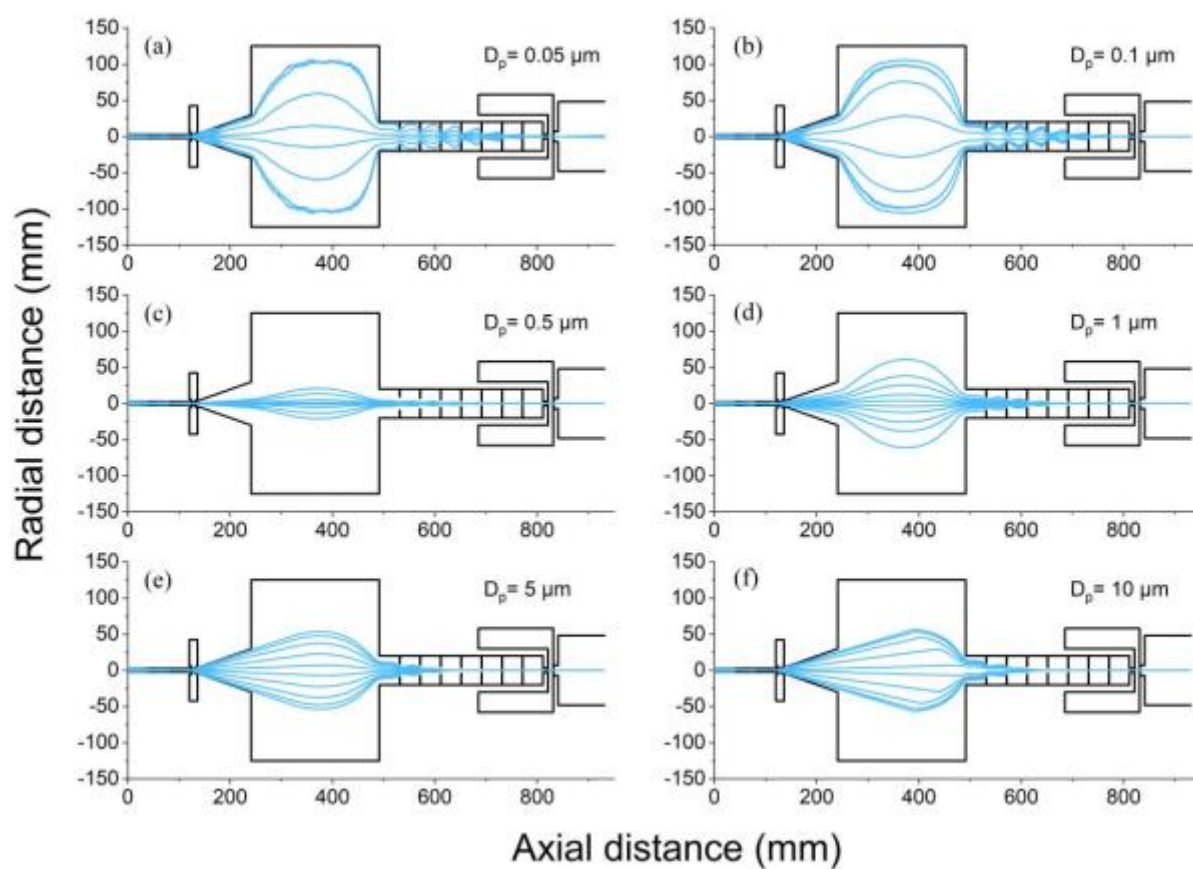

**Figure S3.** Simulation on particle transmission track in the full-size range.

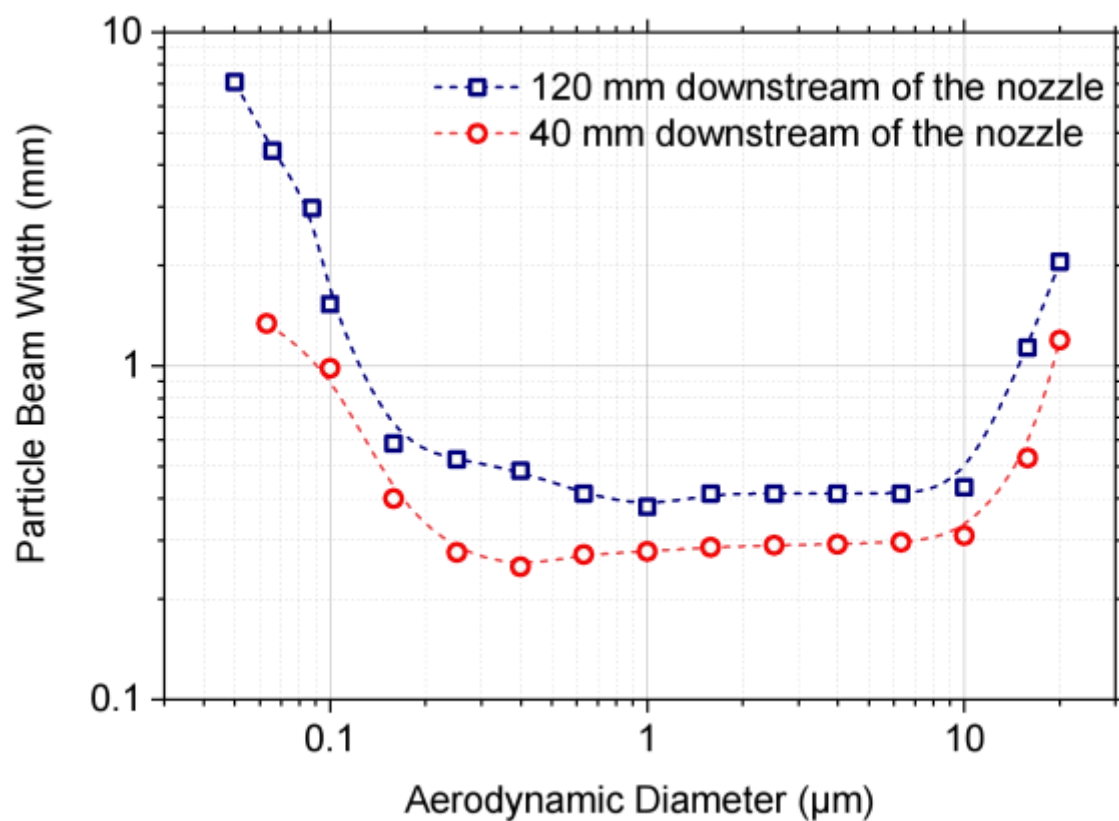

**Figure S4.** Numerical simulation results of particle beam radius at 40 mm and 120 mm downstream of the acceleration nozzle.

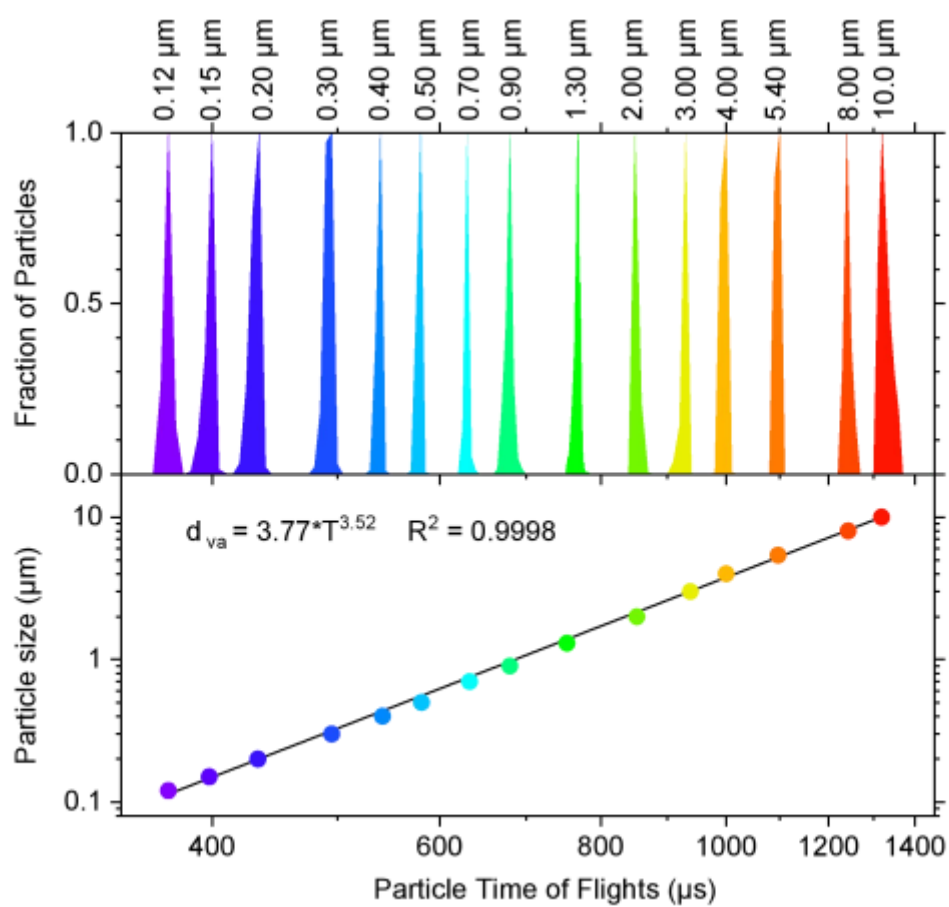

**Figure S5.** Particle size curve calibrated using PSL microspheres.
